# Supplementary material for: Characterization and Genomic Analysis of the Naphthalene-Degrading Delftia tsuruhatensis ULwDis3 Isolated from Seawater
Source: MDPI journal article supplement (doi:10.3390/microorganisms11041092), 2023-04-21
Supplement: s1 [file s1]

## Supplementary Materials

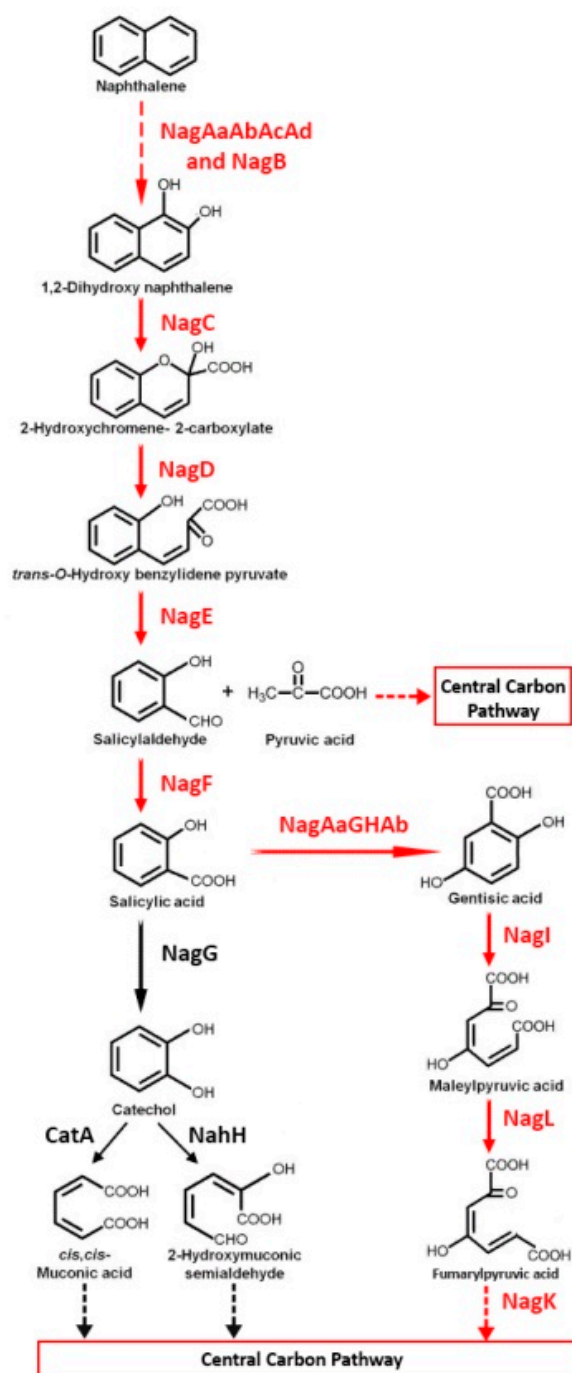

**Figure S1.** Scheme of naphthalene catabolic pathway via catechol (black arrows) and gentisic acid (red arrows). The enzymes involved in naphthalene catabolism are naphthalene 1,2-dioxygenase (NagAaAbAcAd), *cis*-naphthalene dihydrodiol dehydrogenase (NagB), 1,2-dihydroxynaphthalene dioxygenase (NagC), 2-hydroxy-2H-chromene-2-carboxylate isomerase (NagD), *trans*-o-hydroxybenzylidenepyruvate hydratase-aldolase (NagE), salicylaldehyde dehydrogenase (NagF), salicylate hydroxylase (NahG), catechol 2,3-dioxygenase (NahH), catechol 1,2-dioxygenase (catA), salicylate 5-hydroxylase (NagGHAAAb), gentisate 1,2-dioxygenase (NagI), maleylpyruvate isomerase (NagL), and fumarylpyruvate hydrolase (NagK). The red color indicates the naphthalene degradation pathway by the *Delftia tsuruhatensis* strain ULwDis3 and the enzymes involved in its catabolism.

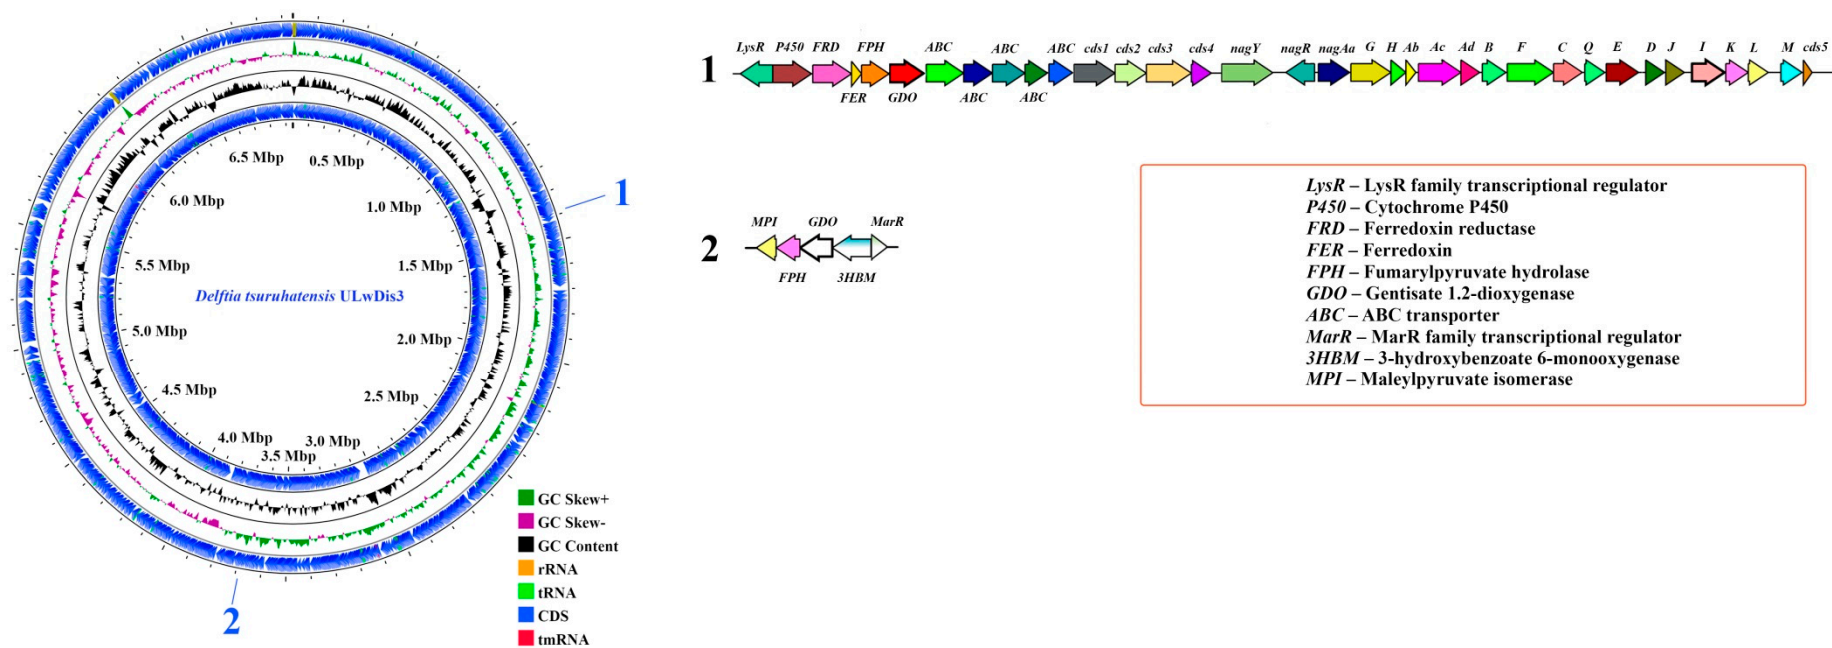

**Figure S2.** Circular map of the *Delftia tsuruhatensis* ULwDis 3 chromosome. From outside to the center: all CDS and RNA genes on forward strand, GC skew, GC content, and all CDS and RNA genes on reverse strand , .

1 - gene site with two gentisate dioxygenases, including the *nag* operon

2 - gene site with a third gentisate dioxygenase

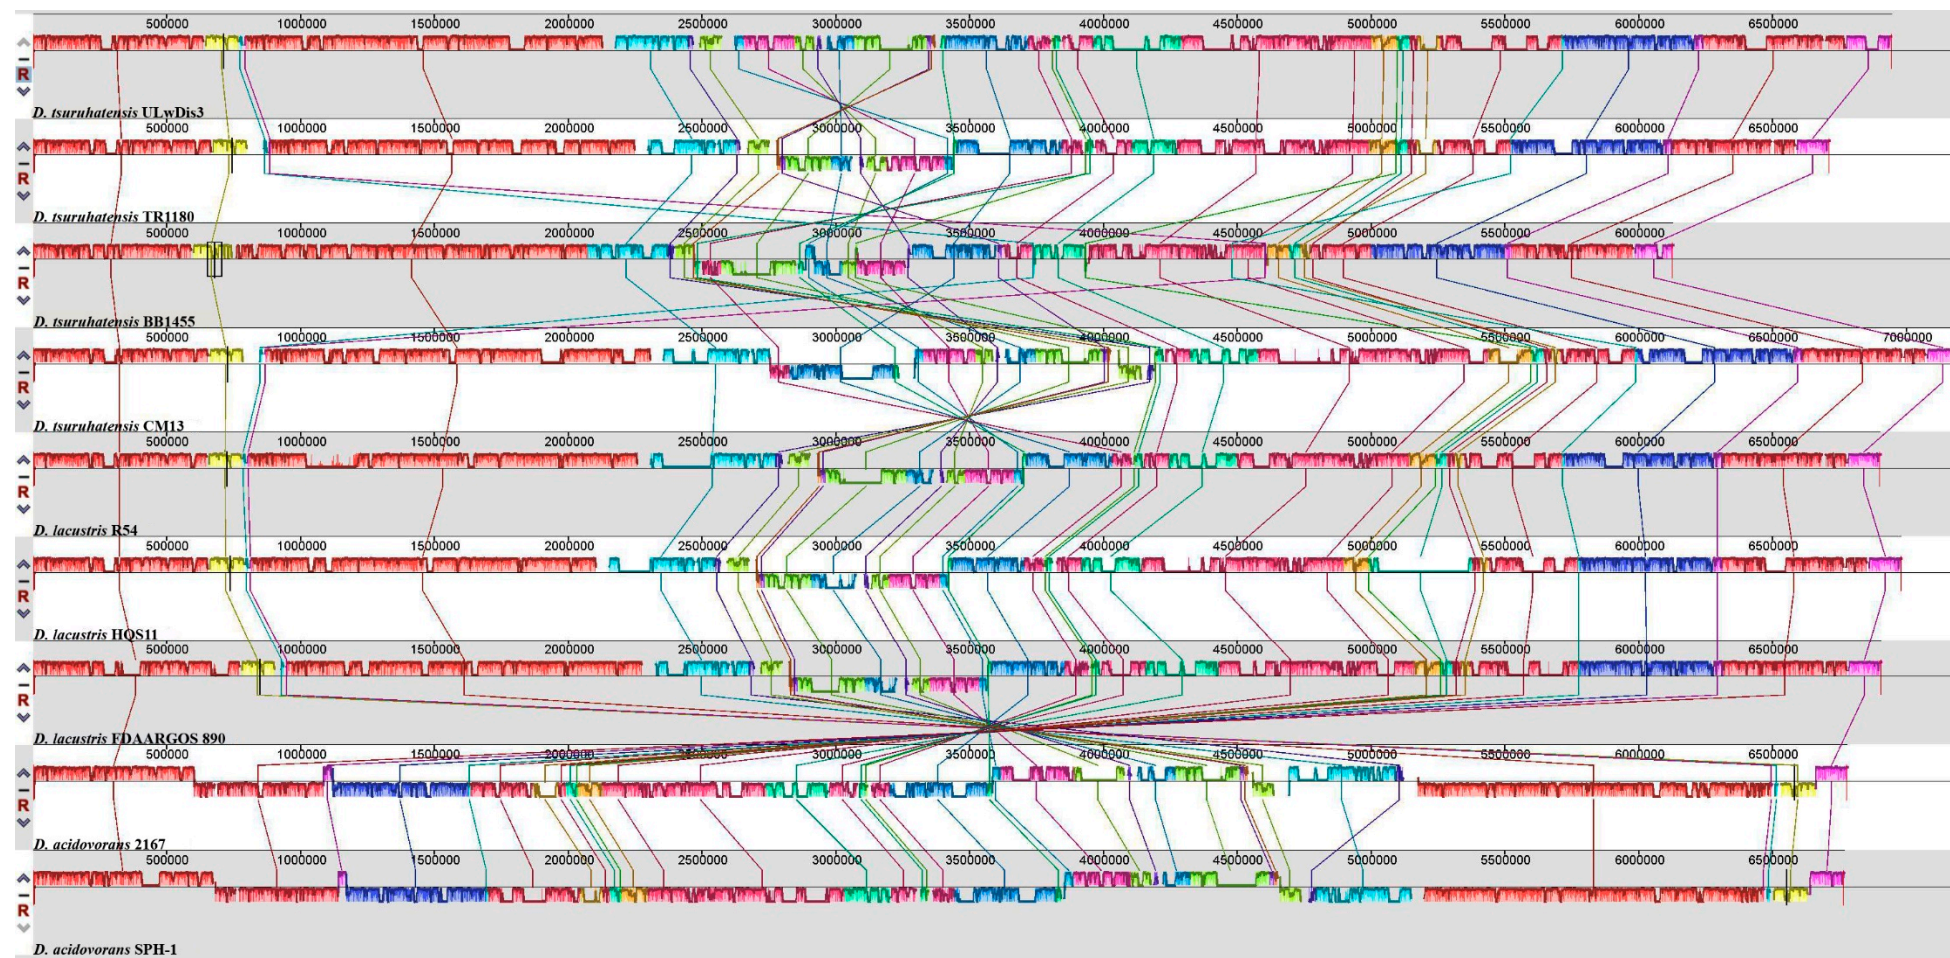

**Figure S3.** Whole genome comparative chromosomes Mauve alignment of different *Delftia* species strains.

\*Colored blocks indicate genome regions aligned with parts of another genome. Each sequence of identically colored blocks represents a collinear set of matching. Homologous blocks in different genomes are connected with lines. Conservation level of genomic regions is shown by the height of the similarity profile.

**Table S1.** Similarity of predicted gene products from the *nag*-gene cluster of *D. tsuruhatensis* ULwDis3 to selected homologs.

| Gene designation | Position (bp) <sup>a</sup> | GC%  | Proposed function                                   | No. of amino acids, ULwDis3/relative <sup>b</sup> | % Amino Acid identity | Source microorganism                     | GeneBank accession number <sup>c</sup> |
|------------------|----------------------------|------|-----------------------------------------------------|---------------------------------------------------|-----------------------|------------------------------------------|----------------------------------------|
| <i>nagY</i>      | 1370733...                 | 64.6 | Chemotaxis protein                                  | 548/548                                           | 100                   | <i>Cupriavidus necator</i> U2            | KAI3589261.1                           |
|                  | 1372379d                   |      |                                                     | 548/429                                           | 100                   | <i>Burkholderia</i> sp. BC1              | APP18104.1                             |
| <i>nagR</i>      | 1372346...                 | 58.4 | Transcriptional regulator, LysR family              | 301/301                                           | 100                   | <i>Cupriavidus necator</i> U2            | KAI3589262.1                           |
|                  | 1373251c                   |      |                                                     | 301/301                                           | 100                   | <i>Burkholderia</i> sp. BC1              | APP18105                               |
|                  |                            |      |                                                     | 301/318                                           | 83.1                  | <i>Polaromonas naphthalenivorans</i> CJ2 | ABM37794.1                             |
| <i>nagAa</i>     | 1373368...                 | 61.1 | Ferredoxin reductase                                | 328/328                                           | 100                   | <i>Cupriavidus necator</i> U2            | KAI3589263.1                           |
|                  | 1374354d                   |      |                                                     | 328/328                                           | 100                   | <i>Burkholderia</i> sp. BC1              | APP18106.1                             |
|                  |                            |      |                                                     | 328/328                                           | 75                    | <i>Polaromonas naphthalenivorans</i> CJ2 | ABM37793.1                             |
| <i>nagG</i>      | 1374400...                 | 61.8 | Salicylate-5-hydroxylase, large oxygenase component | 423/423                                           | 100                   | <i>Cupriavidus necator</i> U2            | KAI3589264.1                           |
|                  | 1375671d                   |      |                                                     | 423/423                                           | 99.1                  | <i>Burkholderia</i> sp. BC1              | APP18107.1                             |
|                  |                            |      |                                                     | 423/420                                           | 89.9                  | <i>Polaromonas naphthalenivorans</i> CJ2 | ABM37792.1                             |
| <i>nagH</i>      | 1375674...                 | 59.5 | Salicylate-5-hydroxylase, small oxygenase component | 161/161                                           | 100                   | <i>Cupriavidus necator</i> U2            | KAI3589265.1                           |
|                  | 1376159d                   |      |                                                     | 161/161                                           | 100                   | <i>Burkholderia</i> sp. BC1              | APP18108.1                             |
|                  |                            |      |                                                     | 161/161                                           | 86.3                  | <i>Polaromonas naphthalenivorans</i> CJ2 | ABM37791.1                             |
| <i>nagAb</i>     | 1376170...                 | 52.4 | Ferredoxin                                          | 104/104                                           | 100                   | <i>Cupriavidus necator</i> U2            | KAI3589266.1                           |
|                  | 1376484d                   |      |                                                     | 104/104                                           | 100                   | <i>Burkholderia</i> sp. BC1              | APP18109.1                             |
|                  |                            |      |                                                     | 104/112                                           | 78.8                  | <i>Polaromonas naphthalenivorans</i> CJ2 | ABM37790.1                             |
| <i>nagAc</i>     | 1376571...                 | 53.2 | Naphthalene dioxygenase, large oxygenase component  | 447/447                                           | 100                   | <i>Cupriavidus necator</i> U2            | KAI3589267.1                           |
|                  | 1377914d                   |      |                                                     | 447/447                                           | 98.4                  | <i>Burkholderia</i> sp. BC1              | APP18110.1                             |
|                  |                            |      |                                                     | 447/447                                           | 95.3                  | <i>Polaromonas naphthalenivorans</i> CJ2 | ABM37789.1                             |

|              |                        |      |                                                                          |                               |                      |                                                                                                          |                                          |
|--------------|------------------------|------|--------------------------------------------------------------------------|-------------------------------|----------------------|----------------------------------------------------------------------------------------------------------|------------------------------------------|
| <i>nagAd</i> | 1377929...<br>1378513d | 53.7 | Naphthalene<br>dioxygenase,<br>small oxygenase<br>component              | 194/194<br>194/194<br>194/194 | 99.8<br>94.3<br>89.7 | <i>Cupriavidus necator</i> U2<br><i>Burkholderia</i> sp. BC1<br><i>Polaromonas naphthalenivorans</i> CJ2 | KAI3589268.1<br>APP18111.1<br>ABM37788.1 |
| <i>nagB</i>  | 1378523...<br>1379356d | 55.9 | <i>cis</i> -Naphthalene<br>dihydrodiol<br>dehydrogenase                  | 277/273<br>277/259<br>277/259 | 99.6<br>94.2<br>93.1 | <i>Cupriavidus necator</i> U2<br><i>Burkholderia</i> sp. BC1<br><i>Polaromonas naphthalenivorans</i> CJ2 | KAI3589269.1<br>APP18112.1<br>ABM37789.1 |
| <i>nagF</i>  | 1379405...<br>1380856d | 59.9 | Salicylaldehyde<br>dehydrogenase                                         | 483/483<br>483/483<br>483/483 | 99.6<br>97.1<br>93.6 | <i>Cupriavidus necator</i> U2<br><i>Burkholderia</i> sp. BC1<br><i>Polaromonas naphthalenivorans</i> CJ2 | KAI3589270.1<br>APP18113.1<br>ABM37790.1 |
| <i>nagC</i>  | 1380882...<br>1381790d | 54.0 | 1,2-<br>Dihydroxynaphtha<br>lene dioxygenase                             | 302/302<br>302/302<br>302/302 | 100<br>97.7<br>94.1  | <i>Cupriavidus necator</i> U2<br><i>Burkholderia</i> sp. BC1<br><i>Polaromonas naphthalenivorans</i> CJ2 | KAI3589271.1<br>APP18114.1<br>ABM37791.1 |
| <i>nagQ</i>  | 1381863..<br>1382498d  | 52.9 | Outer membrane<br>protein                                                | 211/211<br>211/180<br>211/211 | 100<br>93.2<br>91.5  | <i>Cupriavidus necator</i> U2<br><i>Burkholderia</i> sp. BC1<br><i>Polaromonas naphthalenivorans</i> CJ2 | KAI3589272.1<br>APP18115.1<br>ABM37792.1 |
| <i>nagE</i>  | 1382556...<br>1383593d | 57.2 | <i>trans</i> -o-<br>Hydroxybenzylide<br>nepyruvate<br>hydratase–aldolase | 345/345<br>345/345<br>345/345 | 100<br>95.7<br>95.9  | <i>Cupriavidus necator</i> U2<br><i>Burkholderia</i> sp. BC1<br><i>Polaromonas naphthalenivorans</i> CJ2 | KAI3589273.1<br>APP18116.1<br>ABM37793.1 |
| <i>nagD</i>  | 1383776...<br>1384375d | 51.4 | 2-<br>Hydroxychromene<br>carboxylate<br>isomerase                        | 199/196<br>199/197<br>199/197 | 100<br>98.9<br>92.9  | <i>Cupriavidus necator</i> U2<br><i>Burkholderia</i> sp. BC1<br><i>Polaromonas naphthalenivorans</i> CJ2 | KAI3589274.1<br>APP18117.1<br>ABM37794.1 |
| <i>nagJ</i>  | 1384434...<br>1385039d | 55.4 | Glutathione-S-<br>transferase                                            | 201/201<br>201/201            | 99.5<br>99.5         | <i>Cupriavidus necator</i> U2<br><i>Burkholderia</i> sp. BC1                                             | KAI3589275.1<br>APP18118.1               |



|             |                        |      |                               |         |      |                                          |              |
|-------------|------------------------|------|-------------------------------|---------|------|------------------------------------------|--------------|
|             |                        |      |                               | 201/201 | 93.5 | <i>Polaromonas naphthalenivorans</i> CJ2 | ABM37795.1   |
| <i>nagI</i> | 1385270...<br>1386310d | 67.1 | Gentisate 1,2-<br>dioxygenase | 346/346 | 100  | <i>Cupriavidus necator</i> U2            | KAI3589276.1 |
|             |                        |      |                               | 346/355 | 100  | <i>Burkholderia</i> sp. BC1              | APP18119.1   |
|             |                        |      |                               | 346/334 | 85.5 | <i>Polaromonas naphthalenivorans</i> CJ2 | ABM37796.1   |
| <i>nagK</i> | 1386344...<br>1387045d | 64.0 | Fumarylpyruvate<br>hydrolase  | 233/233 | 100  | <i>Cupriavidus necator</i> U2            | KAI3589277.1 |
|             |                        |      |                               | 233/192 | 100  | <i>Burkholderia</i> sp. BC1              | APP18120.1   |
|             |                        |      |                               | 233/289 | 31.1 | <i>Polaromonas naphthalenivorans</i> CJ2 | ABM37797.1   |
| <i>nagL</i> | 1387057...<br>1387695d | 67.3 | Maleylpyruvate<br>isomerase   | 212/212 | 100  | <i>Cupriavidus necator</i> U2            | KAI3589278.1 |
|             |                        |      |                               | 212/212 | 100  | <i>Burkholderia</i> sp. BC1              | APP18121.1   |
| <i>nagM</i> | 1387791...<br>1388783d | 59.2 | Unknown                       | 330/282 | 100  | <i>Cupriavidus necator</i> U2            | KAI3589279.1 |
|             |                        |      |                               | 330/341 | 100  | <i>Burkholderia</i> sp. BC1              | APP18122.1   |

<sup>a</sup> Letters indicate coding strand: c, complementary strand; d, direct strand.

<sup>b</sup> Number of amino acids in ULwDis3 chromosome CDS/number in the closest relative.

<sup>c</sup> GenBank accession number of the closest relative protein.

**Table S2.** Similarity of predicted gene products from *GDO2* and *GDO3* clusters of *D. tsuruhatensis* ULwDis3 to selected homologs.

| Gene designation | Position (bp) <sup>a</sup> | GC%  | Proposed function                      | No. of amino acids, ULwDis3/relative <sup>b</sup> | % Amino Acid identity | Source microorganism                  | GeneBank accession number <sup>c</sup> |
|------------------|----------------------------|------|----------------------------------------|---------------------------------------------------|-----------------------|---------------------------------------|----------------------------------------|
| GDO2 cluster     |                            |      |                                        |                                                   |                       |                                       |                                        |
| LysR             | 1355489..                  | 55.9 | Transcriptional regulator, LysR family | 305/305                                           | 100                   | Cupriavidus necator U2                | KAI3589245.1                           |
|                  | 1356406c                   |      |                                        | 305/305                                           | 100                   | Comamonas testosteroni YAZ2           | BCX54896.1                             |
|                  |                            |      |                                        | 305/339                                           | 100                   | Burkholderia multivorans BC00014      | MBJ9658604.1                           |
| P450             | 1356541..                  | 62.4 | Biotin biosynthesis cytochrome P450    | 412/412                                           | 99.8                  | Cupriavidus necator U2                | KAI3589246.1                           |
|                  | 1357779d                   |      |                                        | 412/412                                           | 100                   | Comamonas testosteroni YAZ2           | BCX54897.1                             |
|                  |                            |      |                                        | 412/412                                           | 100                   | Burkholderia multivorans DDS 15A-1    | AIO76613.1                             |
| FRD              | 1357787..                  | 65.7 | Ferredoxin reductase                   | 412/412                                           | 100                   | Cupriavidus necator U2                | KAI3589247.1                           |
|                  | 1359025d                   |      |                                        | 412/396                                           | 99.8                  | Xenophilus azovorans DSM 13620        | WP_211260262.1                         |
|                  |                            |      |                                        | 412/412                                           | 100                   | Comamonas testosteroni YAZ2           | BCX54898.1                             |
| FER              | 1359044..                  | 58.9 | Ferredoxin                             | 105/106                                           | 100                   | Cupriavidus necator U2                | KAI3589248.1                           |
|                  | 1359364d                   |      |                                        | 105/105                                           | 100                   | Comamonas testosteroni YAZ2           | BCX54899.1                             |
| FPH2             | 1359375..                  | 62.5 | Fumarylpyruvate hydrolase              | 289/289                                           | 100                   | Cupriavidus necator U2                | KAI3589249.1                           |
|                  | 1360244d                   |      |                                        | 289/286                                           | 75.1                  | Variovorax paradoxus                  | QFZ85153.1                             |
|                  |                            |      |                                        | 289/289                                           | 92.4                  | P. naphthalenivorans CJ2              | ABM37779.1                             |
| GDO2             | 1360241..                  | 62.5 | Gentisate 1,2-dioxygenase              | 358/358                                           | 100                   | Cupriavidus necator U2                | KAI3589250.1                           |
|                  | 1361317d                   |      |                                        | 358/328                                           | 99.7                  | Comamonas thiooxydans JC8             | NZ_AWOS01000062                        |
|                  |                            |      |                                        | 358/351                                           | 78.5                  | Paraburkholderia phytofirmans OLGA172 | ANB74996.1                             |
| GDO3 cluster     |                            |      |                                        |                                                   |                       |                                       |                                        |
| MPI3             | 3685200..                  | 70.7 | Maleylpyruvate isomerase               | 213/213                                           | 99.5                  | Delftia sp. HK171                     | TQL81322.1                             |
|                  | 3685841c                   |      |                                        | 213/213                                           | 79.8                  | Variovorax sp. HW608                  | SCK13974.1                             |

|             |                       |      |                                              |         |      |                                         |                |
|-------------|-----------------------|------|----------------------------------------------|---------|------|-----------------------------------------|----------------|
|             |                       |      |                                              | 213/214 | 87.7 | <i>Comamonas</i> sp. AG1104             | RDI10688.1     |
|             |                       |      |                                              | 213/212 | 72.3 | <i>P. naphthalenivorans</i> CJ2         | ABM38445.1     |
| <i>FPH3</i> | 3685861..<br>3686568c | 65.9 | Fumarylpyru-<br>vate hydrolase               | 235/235 | 89.7 | <i>Acidovorax</i> sp. ST3               | WP_110958765.1 |
|             |                       |      |                                              | 235/245 | 100  | <i>Delftia lacustris</i> HQS1           | BDE71824.1     |
|             |                       |      |                                              | 235/235 | 88.9 | <i>Comamonas</i> sp. Tr-654             | NIF82459.1     |
|             |                       |      |                                              | 235/235 | 82.1 | <i>P. naphthalenivorans</i> CJ2         | ABM38444.1     |
| <i>GDO3</i> | 3686607..<br>3687644c | 70.4 | Gentisate 1,2-<br>dioxygenase                | 345/345 | 84.1 | <i>Acidovorax</i> sp. CCYZU-2555        | MBS7781544.1   |
|             |                       |      |                                              | 345/345 | 99.1 | <i>Delftia</i> sp. CH05                 | MXN31744.1     |
|             |                       |      |                                              | 345/351 | 73.9 | <i>P. naphthalenivorans</i> CJ2         | ABM38443.1     |
| <i>3HBM</i> | 3687661..<br>3688869c | 69.5 | 3-<br>hydroxybenzoat<br>e 6-hydroxylase      | 402/402 | 99.6 | <i>Delftia</i> sp. CH05                 | MXN31745.1     |
|             |                       |      |                                              | 402/402 | 91.1 | <i>Acidovorax</i> sp. KKS102            | AFU46209.1     |
|             |                       |      |                                              | 402/402 | 99.5 | <i>Delftia tsuruhatensis</i> TR1180     | QFS65584.1     |
|             |                       |      |                                              | 402/400 | 78.6 | <i>P. naphthalenivorans</i> CJ2         | ABM38442.1     |
| <i>marR</i> | 3689074..<br>3689610d | 69.3 | Transcriptional<br>regulator,<br>MarR family | 178/178 | 97.1 | <i>Delftia acidovorans</i> FDAARGOS_909 | QPS09337.1     |
|             |                       |      |                                              | 178/182 | 80.3 | <i>Comamonas</i> sp. AG1104             | RDI10685.1     |
|             |                       |      |                                              | 178/178 | 98.9 | <i>Delftia tsuruhatensis</i> TR1180     | QFS65583.1     |
|             |                       |      |                                              | 178/161 | 50.4 | <i>P. naphthalenivorans</i> CJ2         | ABM38441.1     |

<sup>a</sup> Letters indicate coding strand: c, complementary strand; d, direct strand.

<sup>b</sup> Number of amino acids in ULwDis3 chromosome CDS/number in the closest relative.

<sup>c</sup> GenBank accession number of the closest relative protein.



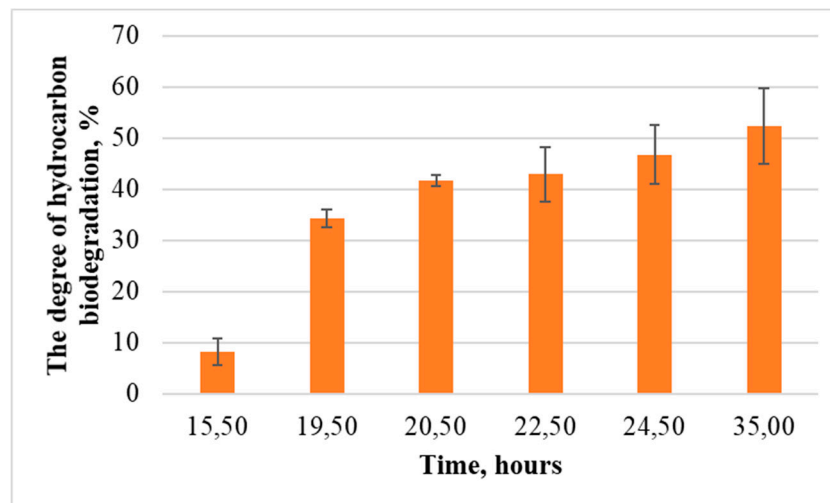

**Figure S4.** Dynamics of naphthalene degradation during cultivation of the strain during the experiment

**Table S3.** Growth adaptation phase of *Delftia tsuruhatensis* strain ULwDis 3 in liquid mineral medium with different concentrations of salicylate

| Salicylate concentration, g/l | Adaptation growth phase, hours |
|-------------------------------|--------------------------------|
| 0,3                           | 23                             |
| 0,4                           | 40                             |
| 0,5                           | 55                             |
| 0,6                           | 80                             |
| 0,8                           | 174                            |
